# Supplementary material for: Optimizing Vaccine Allocation at Different Points in Time during an Epidemic
Source: PubMed Central journal article supplement (PMC2978681; doi:10.1371/journal.pone.0013767), 2010-11-11

**Vaccine distribution by group, 15% coverage**  
**Developed country, minimizing mortality**

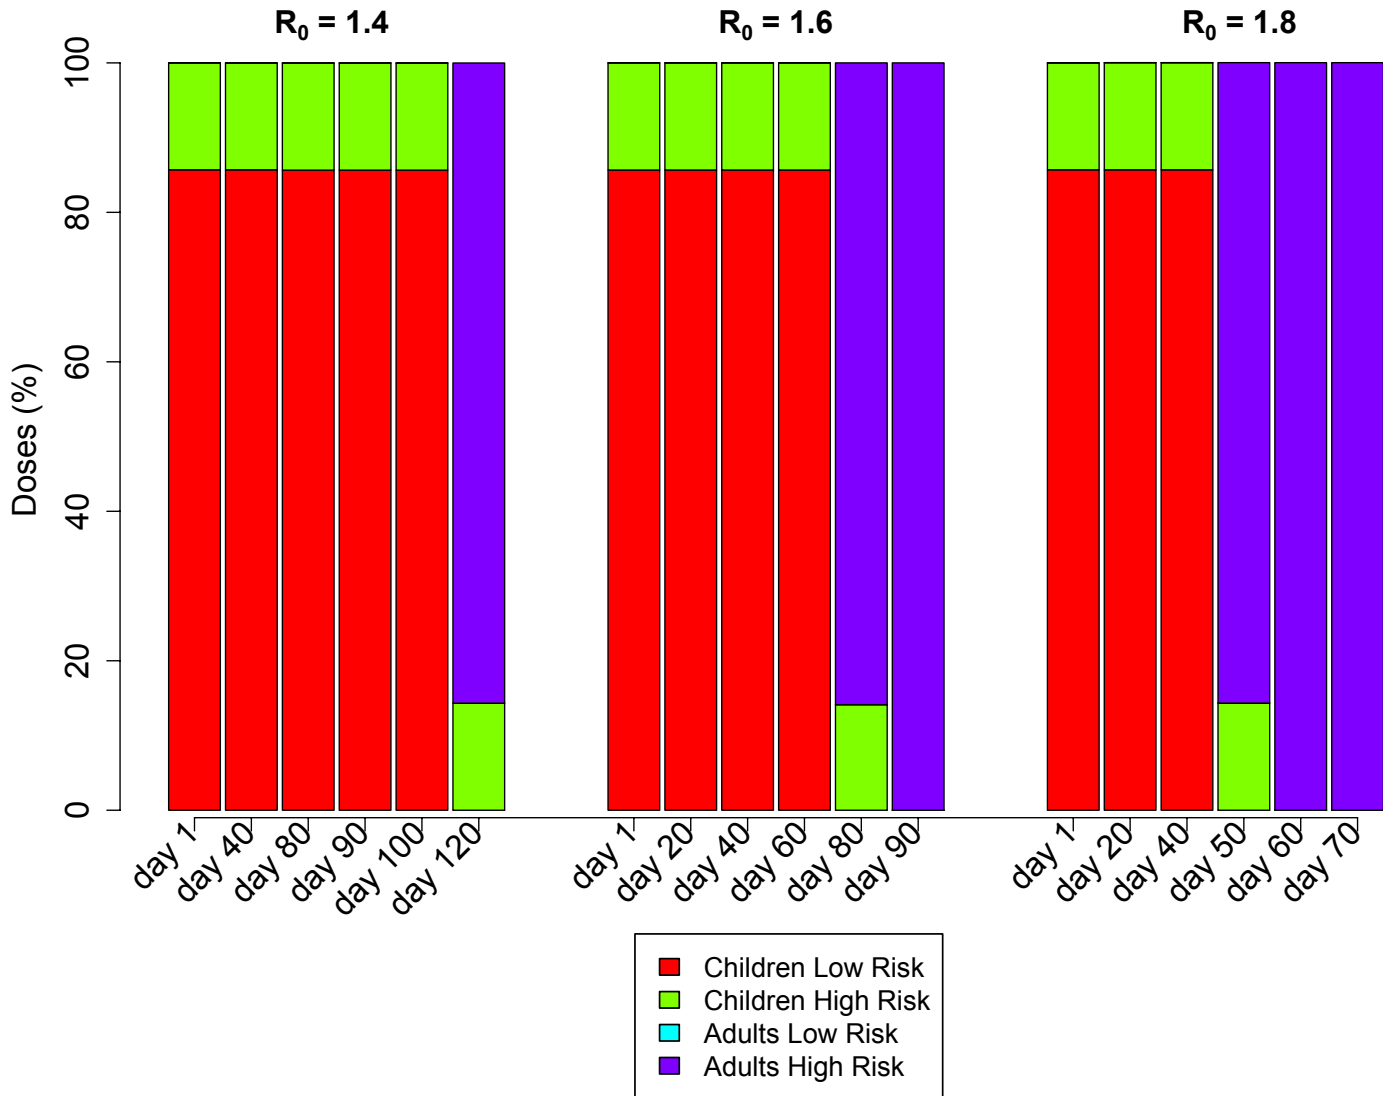

Supplement: pone.0013767.s002.pdf [file pone.0013767.s002.pdf]
