# Supplementary material for: Optimizing Vaccine Allocation at Different Points in Time during an Epidemic
Source: PubMed Central journal article supplement (PMC2978681; doi:10.1371/journal.pone.0013767), 2010-11-11

**Comparison of vaccine distribution by group, 15% coverage,  $R_0 = 1.6$   
(minimizing hospitalizations)**

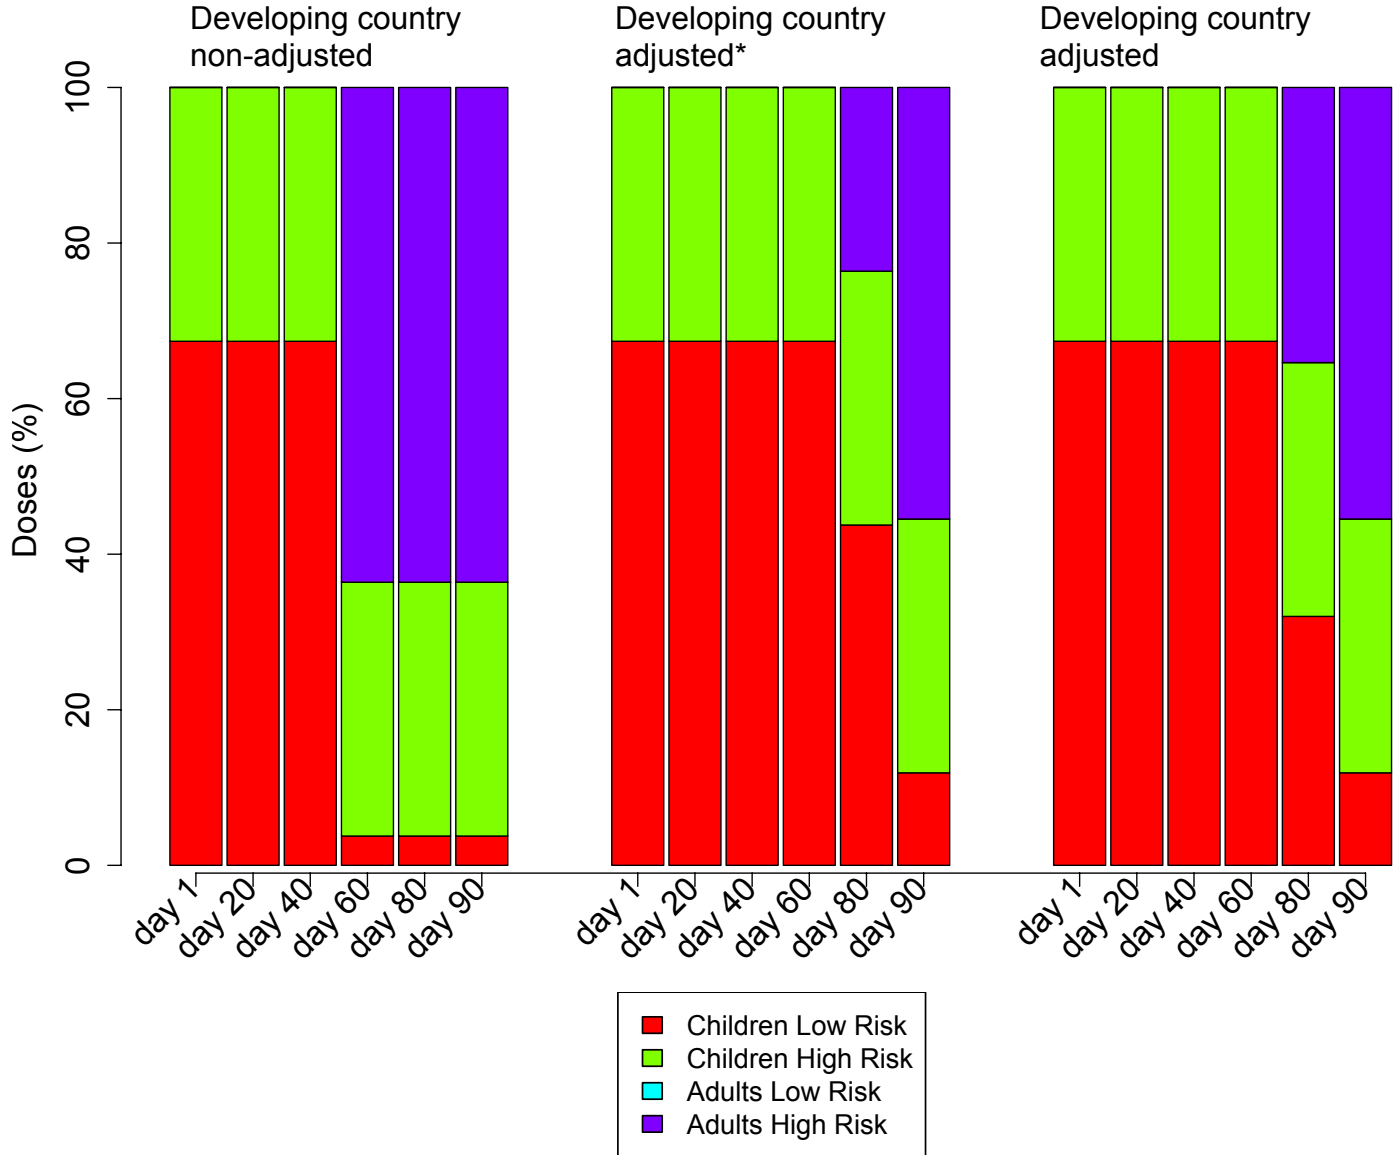

Supplement: pone.0013767.s003.pdf [file pone.0013767.s003.pdf]
