# Supplementary material for: Optimizing Vaccine Allocation at Different Points in Time during an Epidemic
Source: PubMed Central journal article supplement (PMC2978681; doi:10.1371/journal.pone.0013767), 2010-11-11
Supplement: pone.0013767.s005.pdf [file pone.0013767.s005.pdf]

Table S1: Times considered for starting vaccination for each  $R_0$ .

| $R_0$ | Vaccination times |    |    |    |     |     |
|-------|-------------------|----|----|----|-----|-----|
| 1.4   | 1                 | 40 | 80 | 90 | 100 | 120 |
| 1.6   | 1                 | 20 | 40 | 60 | 80  | 90  |
| 1.8   | 1                 | 20 | 40 | 50 | 60  | 70  |
