# Supplementary material for: Optimizing Vaccine Allocation at Different Points in Time during an Epidemic
Source: PubMed Central journal article supplement (PMC2978681; doi:10.1371/journal.pone.0013767), 2010-11-11
Supplement: pone.0013767.s006.pdf [file pone.0013767.s006.pdf]

Table S2: Parameter values.

| Parameter                        | Description                                                                | Value            | Reference               |
|----------------------------------|----------------------------------------------------------------------------|------------------|-------------------------|
| $\gamma$                         | recovery rate                                                              | 0.25             | [14]                    |
| $\rho$                           | fraction of symptomatic                                                    | 2/3              | [14]                    |
| $m$                              | reduction of infectiousness for asymptomatics                              | 0.5              | [14]                    |
| $c_{11}, c_{12}, c_{21}, c_{22}$ | contact rates                                                              | 1, 0.2, 0.2, 0.4 | calculated <sup>a</sup> |
| $VE_S, VE_I, VE_P$               | vaccine efficacies for susceptibility, infectiousness and pathogenicity    | 0.4, 0.45, 0.75  | [15]                    |
| $N$                              | total population                                                           | 200 000          | assumption              |
|                                  | initially infected fraction of the population                              | 1                | assumption              |
|                                  | percentage of children under 18 (US)                                       | 24.16            | [16]                    |
|                                  | percentage of children under 19 (less developed country)                   | 55               | [17]                    |
| $\delta_1$                       | percentage of children at high risk                                        | 8.9              | [18]                    |
| $\delta_2$                       | percentage of adults at high risk                                          | 21.2             | [18]                    |
|                                  | mortality in low risk children                                             | 0.000031         | [19] <sup>b</sup>       |
|                                  | mortality in high risk children                                            | 0.000416         | [19]                    |
|                                  | mortality in low risk adults                                               | 0.000101         | [19]                    |
|                                  | mortality in high risk adults                                              | 0.000821         | [19]                    |
|                                  | hospitalization rate in low risk children                                  | 0.0021           | [19] <sup>c</sup>       |
|                                  | hospitalization rate in high risk children                                 | 0.0279           | [19]                    |
|                                  | hospitalization rate in low risk adults                                    | 0.0024           | [19]                    |
|                                  | hospitalization rate in high risk adults                                   | 0.0129           | [19]                    |
|                                  | adjusted multiplier for mortality and hospitalizations for children in LDC | 8                | assumption              |
|                                  | adjusted multiplier for mortality and hospitalizations for adults in LDC   | 3                | assumption              |

<sup>a</sup>The contact rates were calculated to obtain the final illness attack rates shown in table S3

<sup>b</sup>The mortality rates were computed by weighting the estimates of deaths given in [19] by the percentages of people in each subgroup given in [18].

<sup>c</sup>The hospitalization rates were computed by weighting the estimates of hospitalizations given in [19] by the percentages of people in each subgroup given in [18].
