# Supplementary material for: Optimizing Vaccine Allocation at Different Points in Time during an Epidemic
Source: PubMed Central journal article supplement (PMC2978681; doi:10.1371/journal.pone.0013767), 2010-11-11
Supplement: pone.0013767.s008.pdf [file pone.0013767.s008.pdf]

Table S4: Results for a Developed Country with  $R_0 = 1.4$ .

| Developed Country<br>$R_0 = 1.4$ |                                     | Day 1                   | Day 40        | Day 80        | Day 90        | Day 100        | Day 120        |
|----------------------------------|-------------------------------------|-------------------------|---------------|---------------|---------------|----------------|----------------|
| 2% coverage                      | Optimal strategy (hospitalizations) | [0 93 0 0] <sup>a</sup> | [0 93 0 0]    | [0 93 0 0]    | [0 93 0 0]    | [0 93 0 0]     | [0 93 0 0]     |
|                                  | Illness Attack Rate (%)             | 17.1                    | 17.1          | 17.2          | 18            | 19.4           | 20.3           |
|                                  | Hospitalizations (per 100 cases)    | 0.3827                  | 0.3828        | 0.3833        | 0.4030        | 0.4333         | 0.4488         |
|                                  | Optimal strategy (deaths)           | [0 93 0 0]              | [0 93 0 0]    | [0 93 0 0]    | [0 93 0 0]    | [0 93 0 0]     | [0 93 0 0]     |
|                                  | Illness Attack Rate (%)             | 17.1                    | 17.1          | 17.2          | 18            | 19.4           | 20.3           |
|                                  | Deaths (per 1000 cases)             | 0.1652                  | 0.1652        | 0.1653        | 0.1677        | 0.1713         | 0.1732         |
|                                  | <hr/>                               |                         |               |               |               |                |                |
| 15% coverage                     | Optimal strategy (hospitalizations) | [58 100 0 0]            | [58 100 0 0]  | [58 100 0 0]  | [58 100 0 0]  | [58 100 0 0]   | [58 100 0 0]   |
|                                  | Illness Attack Rate (%)             | 0                       | 0.03          | 0.25          | 7.2           | 15.3           | 19.2           |
|                                  | Hospitalizations (per 100 cases)    | 0.4309                  | 0.4308        | 0.4310        | 0.4398        | 0.4490         | 0.4528         |
|                                  | Optimal strategy (deaths)           | [58 100 0 0]            | [58 100 0 0]  | [58 100 0 0]  | [58 100 0 0]  | [58 100 0 0]   | [0 100 0 80]   |
|                                  | Illness Attack Rate (%)             | 0                       | 0.03          | 0.25          | 7.2           | 15.3           | 19.2           |
|                                  | Deaths (per 1000 cases)             | 0.1897                  | 0.1833        | 0.1822        | 0.1785        | 0.1754         | 0.1672         |
|                                  | <hr/>                               |                         |               |               |               |                |                |
| 25% coverage                     | Optimal strategy (hospitalizations) | [100 100 0 5]           | [100 100 0 5] | [100 100 0 5] | [100 100 0 5] | [100 100 0 5]  | [38 100 0 90]  |
|                                  | Illness Attack Rate (%)             | 0.003                   | 0.02          | 0.14          | 5.5           | 14.2           | 19.2           |
|                                  | Hospitalizations (per 100 cases)    |                         |               |               |               |                |                |
|                                  | Optimal strategy (deaths)           | [100 100 0 5]           | [100 100 0 5] | [100 100 0 5] | [83 100 0 28] | [30 100 0 100] | [30 100 0 100] |
|                                  | Illness Attack Rate (%)             | 0.003 0.02              | 0.1           | 5.8           | 15.7          | 19.3           |                |
|                                  | Deaths (per 1000 cases)             | 0.1949                  | 0.1831        | 0.1814        | 0.1707        | 0.1536         | 0.1682         |

<sup>a</sup>[0 93 0 0] denotes the percentages of people vaccinated in each class, where the first entry corresponds to children low-risk, the second one to children high-risk, the third one to adults low-risk and finally adults high-risk.
