# Supplementary material for: Optimizing Vaccine Allocation at Different Points in Time during an Epidemic
Source: PubMed Central journal article supplement (PMC2978681; doi:10.1371/journal.pone.0013767), 2010-11-11
Supplement: pone.0013767.s009.pdf [file pone.0013767.s009.pdf]

Table S5: Results for a Developed Country with  $R_0 = 1.8$ .

| Developed Country<br>$R_0 = 1.8$ |                                     | Day 1         | Day 20        | Day 40        | Day 50         | Day 60         | Day 70         |
|----------------------------------|-------------------------------------|---------------|---------------|---------------|----------------|----------------|----------------|
| 2% coverage                      | Optimal strategy (hospitalizations) | [0 93 0 0]    | [0 93 0 0]    | [0 93 0 0]    | [0 93 0 0]     | [0 93 0 0]     | [0 93 0 0]     |
|                                  | Illness Attack Rate (%)             | 30.8          | 30.9          | 31.5          | 33.5           | 33.5           | 33.5           |
|                                  | Hospitalizations (per 100 cases)    |               |               |               |                |                |                |
|                                  | Optimal strategy (deaths)           | [0 93 0 0]    | [0 93 0 0]    | [0 93 0 0]    | [0 93 0 0]     | [0 93 0 0]     | [0 93 0 0]     |
|                                  | Illness Attack Rate (%)             | 30.8          | 30.9          | 31.5          | 33.5           | 33.5           | 33.5           |
|                                  | Deaths (per 1000 cases)             | 0.1779        | 0.1780        | 0.1799        | 0.1846         | 0.1846         | 0.1846         |
|                                  |                                     |               |               |               |                |                |                |
| 15% coverage                     | Optimal strategy (hospitalizations) | [58 100 0 0]  | [58 100 0 0]  | [58 100 0 0]  | [0 100 0 80]   | [0 100 0 80]   | [0 100 0 80]   |
|                                  | Illness Attack Rate (%)             | 0.4           | 4.7           | 17.8          | 33.4           | 33.52          | 33.5           |
|                                  | Hospitalizations (per 100 cases)    | 0.4205        | 0.4230        | 0.4382        | 0.4532         | 0.4548         | 0.4550         |
|                                  | Optimal strategy (deaths)           | [58 100 0 0]  | [58 100 0 0]  | [58 100 0 0]  | [58 100 0 0]   | [58 100 0 0]   | [0 100 0 80]   |
|                                  | Illness Attack Rate (%)             | 0.4           | 4.7           | 17.8          | 33.4           | 33.52          | 33.5           |
|                                  | Deaths (per 1000 cases)             | 0.2027        | 0.2033        | 0.1933        | 0.1847         | 0.1846         | 0.1846         |
|                                  |                                     |               |               |               |                |                |                |
| 25% coverage                     | Optimal strategy (hospitalizations) | [100 100 0 0] | [100 100 0 0] | [100 100 0 0] | [30 100 0 100] | [30 100 0 100] | [30 100 0 100] |
|                                  | Illness Attack Rate (%)             | 0.01          | 0.42          | 11.9          | 33.3           | 33.5           | 33.5           |
|                                  | Hospitalizations (per 100 cases)    | 0.4532        | 0.4529        | 0.4531        | 0.4532         | 0.4548         | 0.4550         |
|                                  | Optimal strategy (deaths)           | [100 100 0 0] | [100 100 0 0] | [100 100 0 0] | [83 100 0 28]  | [30 100 0 100] | [30 100 0 100] |
|                                  | Illness Attack Rate (%)             | 0.01          | 0.42          | 11.9          | 33.3           | 33.5           | 33.5           |
|                                  | Deaths (per 1000 cases)             | 0.2089        | 0.2050        | 0.1956        | 0.1843         | 0.1845         | 0.1846         |
|                                  |                                     |               |               |               |                |                |                |
