# Supplementary material for: Optimizing Vaccine Allocation at Different Points in Time during an Epidemic
Source: PubMed Central journal article supplement (PMC2978681; doi:10.1371/journal.pone.0013767), 2010-11-11
Supplement: pone.0013767.s010.pdf [file pone.0013767.s010.pdf]

Table S6: Results for a Less Developed Country, influenza-related mortality and hospitalizations unadjusted,  $R_0 = 1.4$ .

| <b>Less Developed Country<br/>Unadjusted <math>R_0 = 1.4</math></b> |                                     | Day 1        | Day 40       | Day 80         | Day 90         | Day 100        | Day 120        |
|---------------------------------------------------------------------|-------------------------------------|--------------|--------------|----------------|----------------|----------------|----------------|
| 2% coverage                                                         | Optimal strategy (hospitalizations) | [0 41 0 0]   | [0 41 0 0]   | [0 41 0 0]     | [0 41 0 0]     | [0 41 0 0]     | [0 41 0 0]     |
|                                                                     | Illness Attack Rate (%)             | 24.8         | 24.8         | 24.8           | 25.3           | 26.1           | 26.6           |
|                                                                     | Hospitalizations (per 100 cases)    | 0.3950       | 0.3950       | 0.3953         | 0.4092         | 0.4319         | 0.4442         |
|                                                                     | Optimal strategy (deaths)           | [0 41 0 0]   | [0 41 0 0]   | [0 41 0 0]     | [0 41 0 0]     | [0 41 0 0]     | [0 41 0 0]     |
|                                                                     | Illness Attack Rate (%)             | 24.8         | 24.8         | 24.8           | 25.3           | 26.1           | 26.6           |
|                                                                     | Deaths (per 1000 cases)             | 0.1073       | 0.1073       | 0.1074         | 0.1093         | 0.1123         | 0.1140         |
|                                                                     | <hr/>                               |              |              |                |                |                |                |
| 15% coverage                                                        | Optimal strategy (hospitalizations) | [20 100 0 0] | [20 100 0 0] | [20 100 0 0]   | [20 100 0 0]   | [6 100 0 74]   | [1 100 0 100]  |
|                                                                     | Illness Attack Rate (%)             | 2.7          | 5.61         | 8.7            | 16             | 23.5           | 26             |
|                                                                     | Hospitalizations (per 100 cases)    | 0.3156       | 0.3181       | 0.3222         | 0.3742         | 0.4040         | 0.4355         |
|                                                                     | Optimal strategy (deaths)           | [20 100 0 0] | [20 100 0 0] | [1 100 0 100]  | [1 100 0 100]  | [1 100 0 100]  | [1 100 0 100]  |
|                                                                     | Illness Attack Rate (%)             | 2.7          | 5.61         | 18.5           | 20.6           | 24             | 26             |
|                                                                     | Deaths (per 1000 cases)             | 0.0972       | 0.0990       | 0.0577         | 0.0729         | 0.0965         | 0.1097         |
|                                                                     | <hr/>                               |              |              |                |                |                |                |
| 25% coverage                                                        | Optimal strategy (hospitalizations) | [40 100 0 0] | [40 100 0 0] | [40 100 0 0]   | [40 100 0 0]   | [21 100 0 100] | [21 100 0 100] |
|                                                                     | Illness Attack Rate (%)             | 0.02         | 0.127        | 0.87           | 11.37          | 21.7           | 25.5           |
|                                                                     | Hospitalizations (per 100 cases)    | 0.3501       | 0.3534       | 0.3569         | 0.4008         | 0.4118         | 0.4394         |
|                                                                     | Optimal strategy (deaths)           | [40 100 0 0] | [40 100 0 0] | [21 100 0 100] | [21 100 0 100] | [21 100 0 100] | [21 100 0 100] |
|                                                                     | Illness Attack Rate (%)             | 0.02         | 0.12         | 5.7            | 14.3           | 21.7           | 25.4           |
|                                                                     | Deaths (per 1000 cases)             | 0.1128       | 0.1113       | 0.0602         | 0.0809         | 0.1009         | 0.1107         |
