# Supplementary material for: Optimizing Vaccine Allocation at Different Points in Time during an Epidemic
Source: PubMed Central journal article supplement (PMC2978681; doi:10.1371/journal.pone.0013767), 2010-11-11
Supplement: pone.0013767.s011.pdf [file pone.0013767.s011.pdf]

Table S7: Results for a Less Developed Country, influenza-related mortality and hospitalizations adjusted,  $R_0 = 1.4$ .

| <b>Less Developed Country<br/>Adjusted <math>R_0 = 1.4</math></b> |                                     | Day 1        | Day 40       | Day 80       | Day 90         | Day 100        | Day 120        |
|-------------------------------------------------------------------|-------------------------------------|--------------|--------------|--------------|----------------|----------------|----------------|
| 2% coverage                                                       | Optimal strategy (hospitalizations) | [0 41 0 0]   | [0 41 0 0]   | [0 41 0 0]   | [0 41 0 0]     | [0 41 0 0]     | [0 41 0 0]     |
|                                                                   | Illness Attack Rate (%)             | 24.8         | 24.8         | 24.8         | 25.3           | 26.1           | 26.6           |
|                                                                   | Hospitalizations (per 100 cases)    | 2.5465       | 2.5468       | 2.5493       | 2.6628         | 2.8479         | 2.9485         |
|                                                                   | Optimal strategy (deaths)           | [0 41 0 0]   | [0 41 0 0]   | [0 41 0 0]   | [0 41 0 0]     | [0 41 0 0]     | [0 41 0 0]     |
|                                                                   | Illness Attack Rate (%)             | 24.8         | 24.8         | 24.8         | 25.3           | 26.1           | 26.6           |
|                                                                   | Deaths (per 1000 cases)             | 0.5215       | 0.5216       | 0.5220       | 0.5383         | 0.5651         | 0.5797         |
|                                                                   | <hr/>                               |              |              |              |                |                |                |
| 15% coverage                                                      | Optimal strategy (hospitalizations) | [20 100 0 0] | [20 100 0 0] | [20 100 0 0] | [20 100 0 0]   | [20 100 0 0]   | [20 100 0 0]   |
|                                                                   | Illness Attack Rate (%)             | 2.7          | 5.6          | 8.7          | 16             | 22.6           | 25.8           |
|                                                                   | Hospitalizations (per 100 cases)    | 1.8898       | 1.8914       | 1.9064       | 2.3430         | 2.7618         | 2.9306         |
|                                                                   | Optimal strategy (deaths)           | [20 100 0 0] | [20 100 0 0] | [20 100 0 0] | [1 100 0 100]  | [1 100 0 100]  | [1 100 0 100]  |
|                                                                   | Illness Attack Rate (%)             | 2.7          | 5.6          | 8.7          | 20.6           | 24             | 26             |
|                                                                   | Deaths (per 1000 cases)             | 0.4286       | 0.4333       | 0.4399       | 0.3966         | 0.5078         | 0.5648         |
|                                                                   | <hr/>                               |              |              |              |                |                |                |
| 25% coverage                                                      | Optimal strategy (hospitalizations) | [40 100 0 0] | [40 100 0 0] | [40 100 0 0] | [40 100 0 0]   | [40 100 0 0]   | [40 100 0 0]   |
|                                                                   | Illness Attack Rate (%)             | 0.02         | 0.12         | 0.8          | 11.3           | 20.8           | 25.3           |
|                                                                   | Hospitalizations (per 100 cases)    | 2.0352       | 2.0870       | 2.1238       | 2.5373         | 2.8365         | 2.9487         |
|                                                                   | Optimal strategy (deaths)           | [40 100 0 0] | [40 100 0 0] | [40 100 0 0] | [21 100 0 100] | [21 100 0 100] | [21 100 0 100] |
|                                                                   | Illness Attack Rate (%)             | 0.02         | 0.12         | 0.81         | 14.3           | 217            | 25.5           |
|                                                                   | Deaths (per 1000 cases)             | 0.4822       | 0.4837       | 0.4872       | 0.4342         | 0.5285         | 0.5703         |
