# Supplementary material for: Optimizing Vaccine Allocation at Different Points in Time during an Epidemic
Source: PubMed Central journal article supplement (PMC2978681; doi:10.1371/journal.pone.0013767), 2010-11-11
Supplement: pone.0013767.s012.pdf [file pone.0013767.s012.pdf]

Table S8: Results for a Less Developed Country, influenza-related mortality and hospitalizations unadjusted,  $R_0 = 1.8$ .

| Less Developed Country<br>Unadjusted $R_0 = 1.8$ |                                     | Day 1         | Day 20         | Day 40         | Day 50         | Day 60         | Day 70         |
|--------------------------------------------------|-------------------------------------|---------------|----------------|----------------|----------------|----------------|----------------|
| 2% coverage                                      | Optimal strategy (hospitalizations) | [0 41 0 0]    | [0 41 0 0]     | [0 41 0 0]     | [0 41 0 0]     | [0 41 0 0]     | [0 41 0 0]     |
|                                                  | Illness Attack Rate (%)             | 38.90         | 38.9           | 39.3           | 40             | 40.4           | 40.5           |
|                                                  | Hospitalizations (per 100 cases)    | 0.4005        | 0.4010         | 0.4154         | 0.4345         | 0.4447         | 0.4479         |
|                                                  | Optimal strategy (deaths)           | [0 39 0 1]    | [0 32 0 5]     | [0 0 0 21]     | [0 0 0 21]     | [0 0 0 21]     | [0 0 0 21]     |
|                                                  | Illness Attack Rate (%)             | 38.9          | 39.1           | 39.9           | 40.1           | 40.4           | 40.5           |
|                                                  | Deaths (per 1000 cases)             | 0.1173        | 0.1169         | 0.1166         | 0.1196         | 0.1221         | 0.1232         |
|                                                  | <hr/>                               |               |                |                |                |                |                |
| 15% coverage                                     | Optimal strategy (hospitalizations) | [1 100 0 100] | [1 100 0 100]  | [1 100 0 100]  | [1 100 0 100]  | [1 100 0 100]  | [0 100 2 100]  |
|                                                  | Illness Attack Rate (%)             | 31.9          | 32             | 33.9           | 37.1           | 39.3           | 40.2           |
|                                                  | Hospitalizations (per 100 cases)    | 0.2664        | 0.2680         | 0.3227         | 0.3934         | 0.4312         | 0.4438         |
|                                                  | Optimal strategy (deaths)           | [1 100 0 100] | [1 100 0 100]  | [1 100 0 100]  | [0 100 2 100]  | [0 100 2 100]  | [0 100 2 100]  |
|                                                  | Illness Attack Rate (%)             | 31.9          | 32             | 33.9           | 37.1           | 39.3           | 40.2           |
|                                                  | Deaths (per 1000 cases)             | 0.0623        | 0.0628         | 0.0780         | 0.1004         | 0.1152         | 0.1210         |
|                                                  | <hr/>                               |               |                |                |                |                |                |
| 25% coverage                                     | Optimal strategy (hospitalizations) | [40 100 0 0]  | [40 100 0 0]   | [21 100 0 100] | [21 100 0 100] | [21 100 0 100] | [3 100 25 100] |
|                                                  | Illness Attack Rate (%)             | 15.3          | 16.2           | 27.7           | 34.5           | 38.5           | 39.9           |
|                                                  | Hospitalizations (per 100 cases)    | 0.3496        | 0.3521         | 0.3369         | 0.4033         | 0.4346         | 0.4448         |
|                                                  | Optimal strategy (deaths)           | [40 100 0 0]  | [21 100 0 100] | [21 100 0 100] | [0 100 29 100] | [0 100 29 100] | [0 100 29 100] |
|                                                  | Illness Attack Rate (%)             | 15.3          | 22.7           | 27.7           | 35.5           | 38.7           | 39.9           |
|                                                  | Deaths (per 1000 cases)             | 0.1250        | 0.0657         | 0.0827         | 0.1001         | 0.1153         | 0.1211         |
