# Supplementary material for: Optimizing Vaccine Allocation at Different Points in Time during an Epidemic
Source: PubMed Central journal article supplement (PMC2978681; doi:10.1371/journal.pone.0013767), 2010-11-11
Supplement: pone.0013767.s013.pdf [file pone.0013767.s013.pdf]

Table S9: Results for a Less Developed Country, influenza-related mortality and hospitalizations adjusted,  $R_0=1.8$ .

| Less Developed Country<br>Adjusted $R_0 = 1.8$ |                                     | Day 1         | Day 20        | Day 40         | Day 50         | Day 60         | Day 70         |
|------------------------------------------------|-------------------------------------|---------------|---------------|----------------|----------------|----------------|----------------|
| 2% coverage                                    | Optimal strategy (hospitalizations) | [0 41 0 0]    | [0 41 0 0]    | [0 41 0 0]     | [0 41 0 0]     | [0 41 0 0]     | [0 41 0 0]     |
|                                                | Illness Attack Rate (%)             | 38.9          | 38.9          | 39.3           | 40             | 40.4           | 40.5           |
|                                                | Hospitalizations (per 100 cases)    | 2.4763        | 2.4798        | 2.5984         | 2.7559         | 2.8400         | 2.8664         |
|                                                | Optimal strategy (deaths)           | [0 41 0 0]    | [0 41 0 0]    | [0 41 0 0]     | [0 41 0 0]     | [0 41 0 0]     | [0 41 0 0]     |
|                                                | Illness Attack Rate (%)             | 38.9          | 38.9          | 39.3           | 40             | 40.4           | 40.5           |
|                                                | Deaths (per 1000 cases)             | 0.5390        | 0.5395        | 0.5564         | 0.5789         | 0.5909         | 0.5947         |
|                                                | <hr/>                               |               |               |                |                |                |                |
| 15% coverage                                   | Optimal strategy (hospitalizations) | [20 100 0 0]  | [20 100 0 0]  | [20 100 0 0]   | [8 100 0 60]   | [1 100 0 100]  | [1 100 0 100]  |
|                                                | Illness Attack Rate (%)             | 26.8          | 26.9          | 31             | 36.7           | 39.3           | 40.2           |
|                                                | Hospitalizations (per 100 cases)    | 1.8690        | 1.8812        | 2.2492         | 2.6055         | 2.7926         | 2.8534         |
|                                                | Optimal strategy (deaths)           | [1 100 0 100] | [1 100 0 100] | [1 100 0 100]  | [1 100 0 100]  | [1 100 0 100]  | [0 100 2 100]  |
|                                                | Illness Attack Rate (%)             | 31.9          | 32            | 33.9           | 37.1           | 39.3           | 40.2           |
|                                                | Deaths (per 1000 cases)             | 0.3266        | 0.3289        | 0.4049         | 0.5075         | 0.5661         | 0.5868         |
|                                                | <hr/>                               |               |               |                |                |                |                |
| 25% coverage                                   | Optimal strategy (hospitalizations) | [40 100 0 0]  | [40 100 0 0]  | [40 100 0 0]   | [40 100 0 0]   | [40 100 0 0]   | [40 100 0 0]   |
|                                                | Illness Attack Rate (%)             | 15.3          | 16.2          | 24.7           | 34.2           | 38.5           | 40             |
|                                                | Hospitalizations (per 100 cases)    | 1.8795        | 1.8981        | 2.3426         | 2.6613         | 2.8128         | 2.8593         |
|                                                | Optimal strategy (deaths)           | [40 100 0 0]  | [40 100 0 0]  | [21 100 0 100] | [21 100 0 100] | [21 100 0 100] | [3 100 29 100] |
|                                                | Illness Attack Rate (%)             | 15.3          | 16.2          | 27.7           | 34.5           | 38.5           | 39.9           |
|                                                | Deaths (per 1000 cases)             | 0.4960        | 0.4990        | 0.4249         | 0.5216         | 0.5710         | 0.5881         |
