# Supplementary material for: Optimizing Vaccine Allocation at Different Points in Time during an Epidemic
Source: PLoS One. 2010 Nov 11;5(11):e13767. doi: 10.1371/journal.pone.0013767 (PMC2978681; doi:10.1371/journal.pone.0013767)
Supplement: Table S3 — Final illness attack rates for the developed country setting for the range of basic reproduction numbers considered. (0.03 MB PDF) [file pone.0013767.s007.pdf]

Table S3: Final illness attack rates for the developed country setting for the range of basic reproduction numbers considered.

| $R_0$ | Overall illness attack rate | Illness attack rate in children | Illness attack rate in adults |
|-------|-----------------------------|---------------------------------|-------------------------------|
| 1     | 0                           | 0                               | 0                             |
| 1.2   | 8.1                         | 11.6                            | 3.9                           |
| 1.3   | 19.9                        | 27.4                            | 10.6                          |
| 1.4   | 26.7                        | 35.9                            | 15.5                          |
| 1.5   | 31                          | 40.8                            | 19                            |
| 1.6   | 34.6                        | 44.8                            | 22.1                          |
| 1.7   | 37.9                        | 48.3                            | 25.3                          |
| 1.8   | 40.6                        | 50.9                            | 28                            |
